# Supplementary material
Source: Springer Nature journal article supplement (https://www.springermedizin.de/resource/supplementary/12943_2013_1176_MOESM3_ESM.pdf/9552258)

# PRIMARY TUMOR

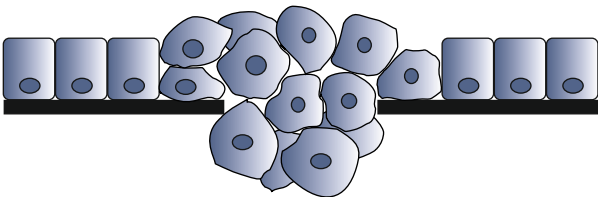

EMT

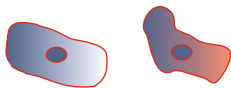

INTRAVASATION

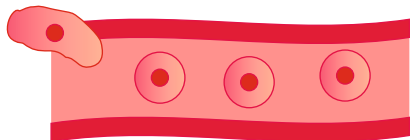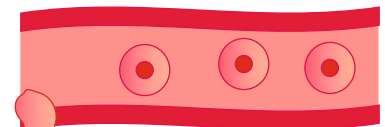

MET

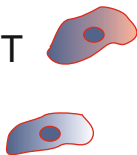

EXTRAVASATION

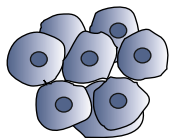

METASTASIS

Supplement: MOESM3 [file 9552258]
